# Supplementary material
Source: PubMed Central journal article supplement (PMC9122558)
Supplement: NIHMS1804602-supplement-Supplementary_Material.pdf [file NIHMS1804602-supplement-Supplementary_Material.pdf]

# Supporting Information

Evaluation of azobenzene nanogels as anti-bacterial additives in adhesive dentistry

TRIVEDI R, GAUTAM D, KEHE G, ESCOBEDO H, PATEL K,  
STANSBURY J, SCHURR M, NAIR D

University of Colorado Anschutz Medical Campus - Aurora, Colorado,  
USA

University of Colorado Boulder - Boulder, Colorado, USA

**Figure S1.** The methacrylated azobenzene nanogels were synthesized using thermally-initiated, solution polymerization protocol in which the isocyanate and alcohol functional groups at  $2225\text{ cm}^{-1}$  (A) and  $3350\text{ cm}^{-1}$  (B) were monitored throughout the synthesis.

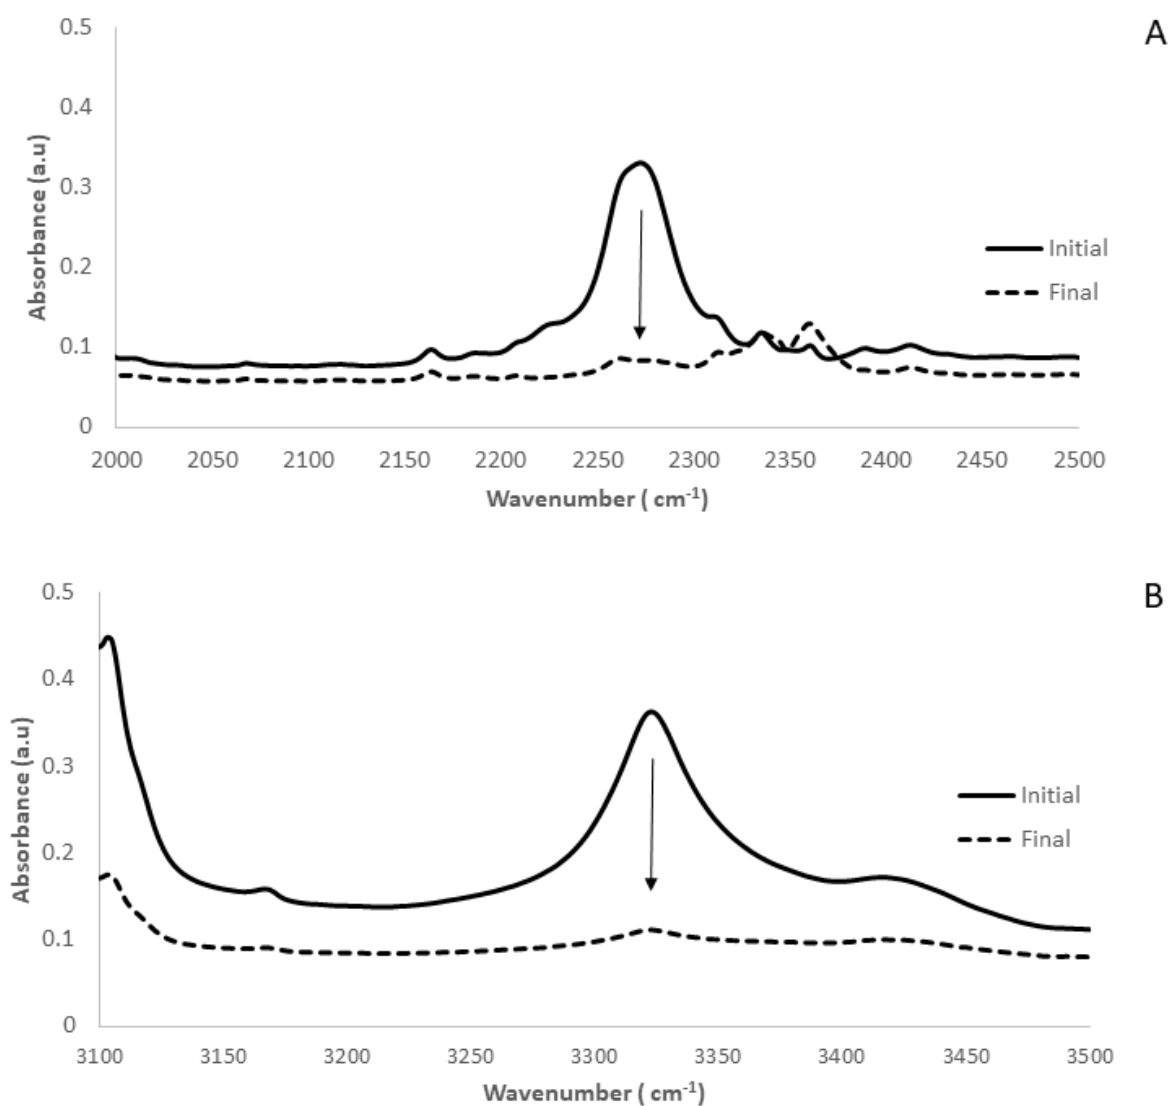

**Figure S2.** The rate of polymerization for the B/H/E system with 0 wt.%, 0.5 wt.%, 1.5 wt.%, and 2.5 wt.% methacrylated azobenzene nanogels was evaluated using two different photoinitiating methods. The first initiating system (A) incorporated 2wt% of a 1:1 ratio of camphorquinone (CQ) and ethyl 4-(dimethylamino)benzoate (EDMAB) along with a four min exposure with a 700 mW/cm<sup>2</sup> (400-500 nm) LED light source. The second initiating system (B) consisted of both, 2wt. % the photoinitiators CQ-EDMAB, along with the redox initiators benzoyl peroxide (4 wt.%) and dimethyl-p-toluidine (2 wt.%) followed by two 20 s exposures of the same 700 mW/cm<sup>2</sup> (400-500 nm) LED light source.

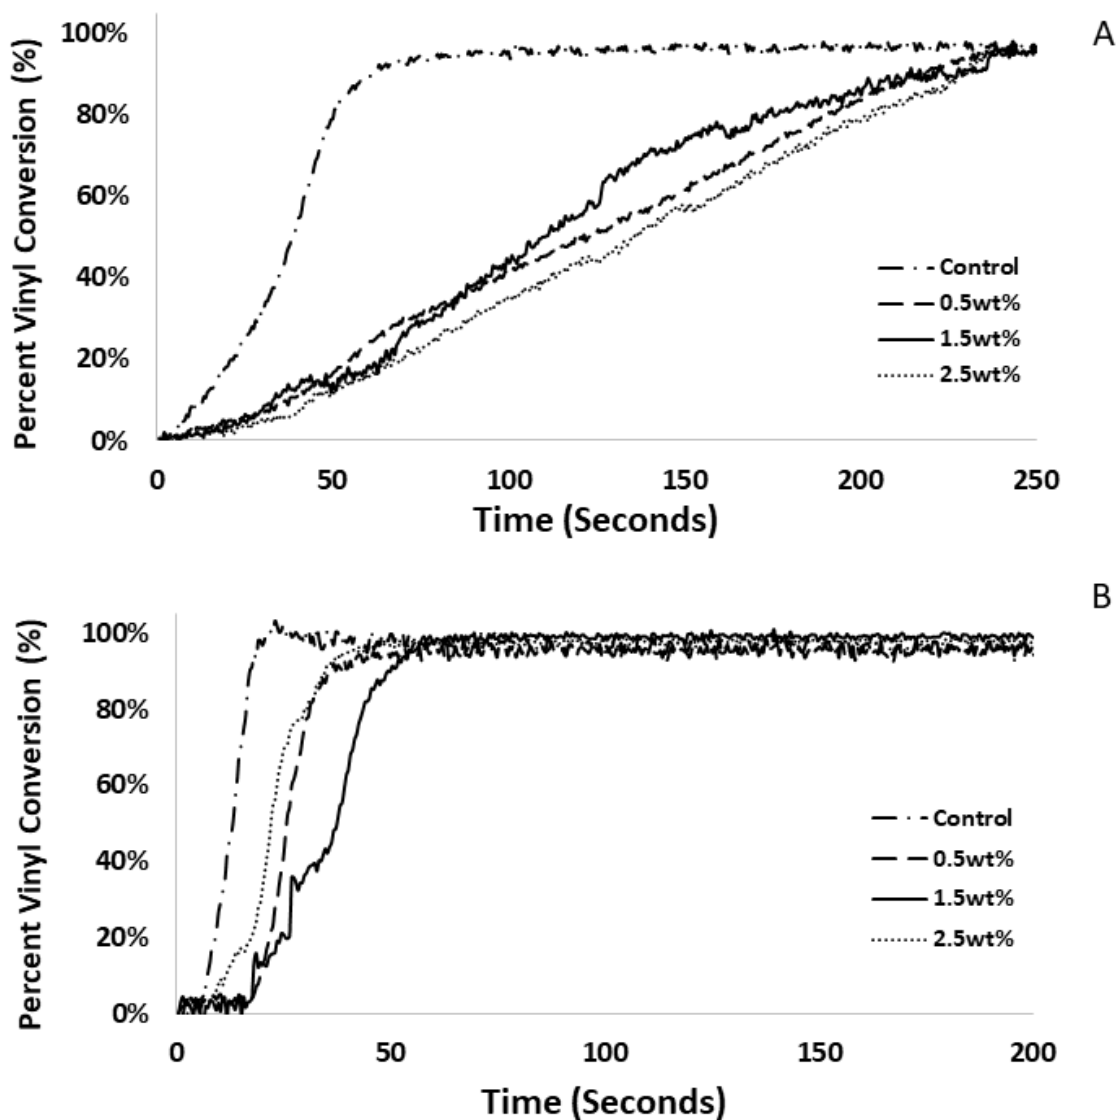

**Table S1.** The AB-NG nanogels were characterized with GPC in Tetrahydrofuran.

| <b>Molecular Weight (Da)</b> | <b>Radius (nm)</b> | <b>Polydispersity Index</b> |
|------------------------------|--------------------|-----------------------------|
| 12,118                       | 1.74               | 1.64                        |
